# Supplementary material
Source: publisher site journal article supplement (http://www.degruyter.com/publication/journal_key/AUT/downloadAsset/AUT_AUTEX%20Article%20Processing%20Charges.pdf)
Supplement: Supplementary file 1 [file AUT_AUTEX%20Article%20Processing%20Charges.pdf]

## **Article Processing Charges: *Autex Research Journal***

### **Effective from 1<sup>st</sup> March 2023**

In order to sustain the publication of our fully refereed journal, all articles accepted for publication in *Autex Research Journal* will be subject to an Article Processing Charge (APC). This fee is used to cover the cost of the editorial process, professional typesetting and copyediting, as well as online hosting and long-term preservation.

Information regarding payment of the APC will be provided after an article has been accepted for publication. Enquiries regarding APCs should be addressed to the Editor in Chief.

APCs are collected via the RightsLink system (provided by Copyright Clearance Centre). The payment can be made in EUR, USD or GBP, and may be subject to VAT where applicable.

**The current APC for *Autex Research Journal* is €1500.** First named authors affiliated with [accredited institutional members of AUTEX](#) are entitled to a **discounted rate of €1000.**

### **Discount and Waiver Policy**

If the first named author is affiliated with an organization that has an [open access agreement](#) with De Gruyter, the APC may be covered or discounted.

In addition, AUTEX and De Gruyter are committed to supporting researchers in emerging nations to share their research with a global audience. As per [World Bank definitions](#), first named authors from lower income countries will be entitled to a 100% discount on the APC and first named authors from lower middle income countries will be entitled to a 50% discount on the APC.

We will also consider requests for discretionary waivers for researchers who aren't eligible under the criteria above.

For any questions relating to discounts and waivers please contact the Editor in Chief.
